# Supplementary material
Source: Springer Nature journal article supplement (https://www.springermedizin.de/resource/supplementary/12889_2010_3017_MOESM1_ESM.pdf/9487996)

**Figure 1.** Contextual influences on TB Infection Prevention and Control (overarching themes, key themes & sub-themes)

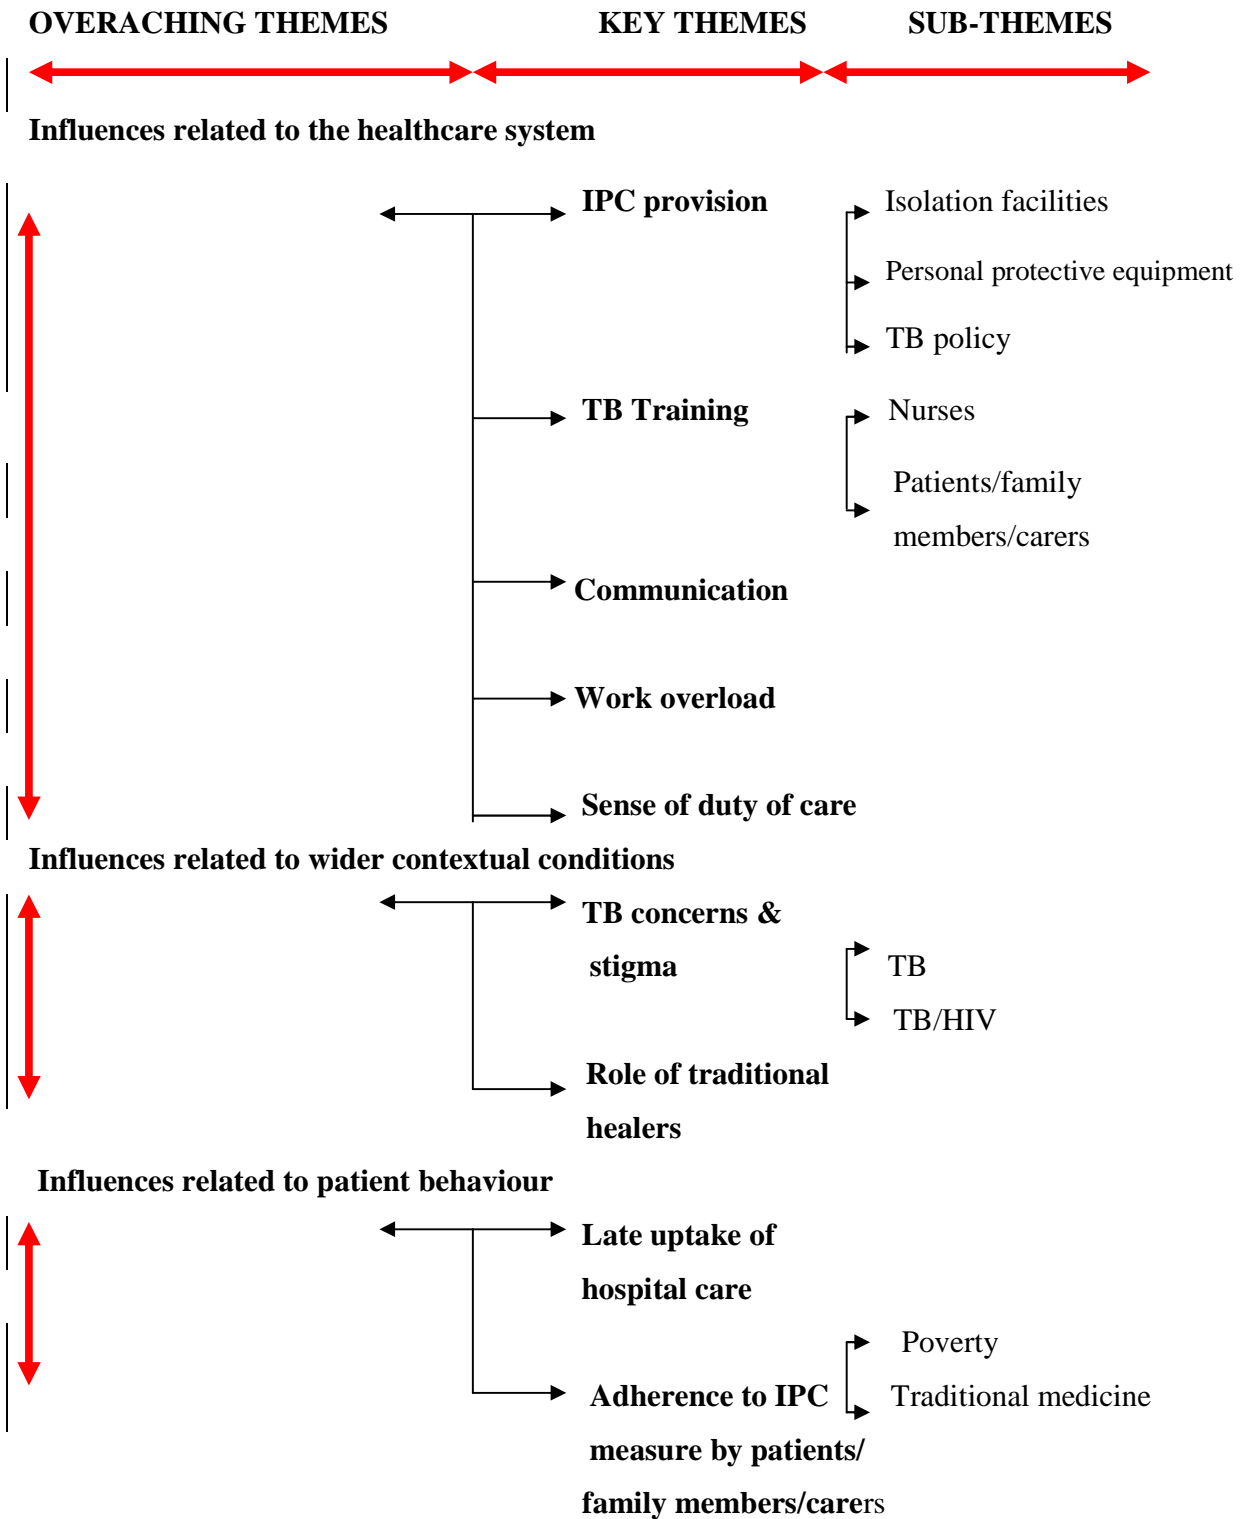

Supplement: MOESM1 [file 9487996]
